# Supplementary material for: Experience, impact and expectations: a longitudinal study of postpartum perineal pain
Source: Research Square preprint supplement (doi:10.21203/rs.3.rs-6938058/v1), 2025-07-27
Supplement: Supplementary file 1 [file 0fbf23b166b1d06e97c0be81.pdf]

Please complete the questionnaire below.

1. Age:

---

- ☐ France
- ☐ Canada
- ☐ UK

---

---

- ☐ Midwifery led unit
- ☐ Homebirth
- ☐ Hospital setting

☐ Induced

☐ Spontaneous

☐ I don't know

- ☐ Vacuum delivery
- ☐ Forceps delivery
- ☐ None of the above
- ☐ I don't know

☐ Epidural  
☐ Gas and air  
☐ Spinal epidural  
☐ Other: \_\_\_\_\_  
☐ No pain relief

---

- ☐ Lying down on your back
- ☐ Lying down on your side
- ☐ On all fours
- ☐ Crouching
- ☐ Standing up
- ☐ On a birthing stool
- ☐ Other (please specify):

---

Click the grey square, and drag to your numbered level

0 (extremely negative experience)      5      10 (extremely positive birth experience)

[illegible]

(Place a mark on the scale above)

---

13. Regarding the perineum, was it considered to be:

- ☐ Intact
- ☐ Tear
- ☐ Episiotomy
- ☐ Lacerations
- ☐ I don't know

---

14. Have you ever experienced perineal pain before pregnancy and birth?

- ☐ Yes
- ☐ No

---

Was this pain:

- ☐ Following the birth of one of your other children?
- ☐ Prior to any pregnancy?
- ☐ Following a specific event?

---

Please specify:

---

**Questionnaire 1 - Part 2**

1. How would you rate your current level of perineal pain on a scale from 0 (no pain) to 10 (extremely painful)?

Click the grey square, and drag to your numbered level

0 (no pain) 5 10 (extremely painful)

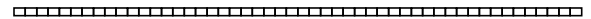

(Place a mark on the scale above)

2. In your view, what is the main function of the perineum?

\_\_\_\_\_

2b. In your view, do you consider your perineum to fulfill that function to date?

- ☐ Yes  
☐ No

2c. Please rate how you consider your perineum to fulfil that function to date:

Click the grey square, and drag to your numbered level

0 (poor functioning) 10 (highly functioning)

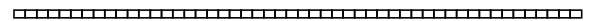

(Place a mark on the scale above)

3. Are you experiencing other types of pain at the moment?

- ☐ Yes  
☐ No  
☐ Unsure

3b. Please describe:

\_\_\_\_\_

4. Are you using pain relief? (select all possible answers)

- ☐ Pharmaceutical pain relief (paracetamol, ibuprofen, other)  
☐ Non pharmaceutical pain relief (acupressure, ice packs, massages)  
☐ None of the above

5. Do any of the following words describe your current perineal sensations? (select all possible answers)

- ☐ Pain  
☐ Burning  
☐ Itching  
☐ Looseness  
☐ Weight  
☐ Discomfort  
☐ Swollenness  
☐ Other (please specify): \_\_\_\_\_  
☐ None

6. Do you consider the current perineal sensations to be normal?

- ☐ Yes  
☐ No  
☐ Other

6b. Please specify:

\_\_\_\_\_

---

7. How strongly do the perineal sensations impact your everyday life:

- ☐ Not at all
  - ☐ A little
  - ☐ Moderately
  - ☐ Strongly
  - ☐ Very strongly
- 

8. Which elements of your everyday life are negatively impacted by your perineal sensations (select all that apply)?

- ☐ Urinating
  - ☐ Defecating
  - ☐ Walking
  - ☐ Standing up
  - ☐ Breastfeeding/feeding infant
  - ☐ Nursing infant
  - ☐ Exercising
  - ☐ Caring for other children
  - ☐ Domestic chores
  - ☐ Sexual activity
  - ☐ Other (please specify): \_\_\_\_\_
- 

9. Would you be willing to consider participating in a qualitative interview to dig into your experience more in depth for a better understanding?

- ☐ Yes
- ☐ No
